# Supplementary material
Source: Springer Nature journal article supplement (https://www.springermedizin.de/resource/supplementary/13063_2010_467_MOESM2_ESM.pdf/9618276)
Supplement: MOESM2 [file 9618276]

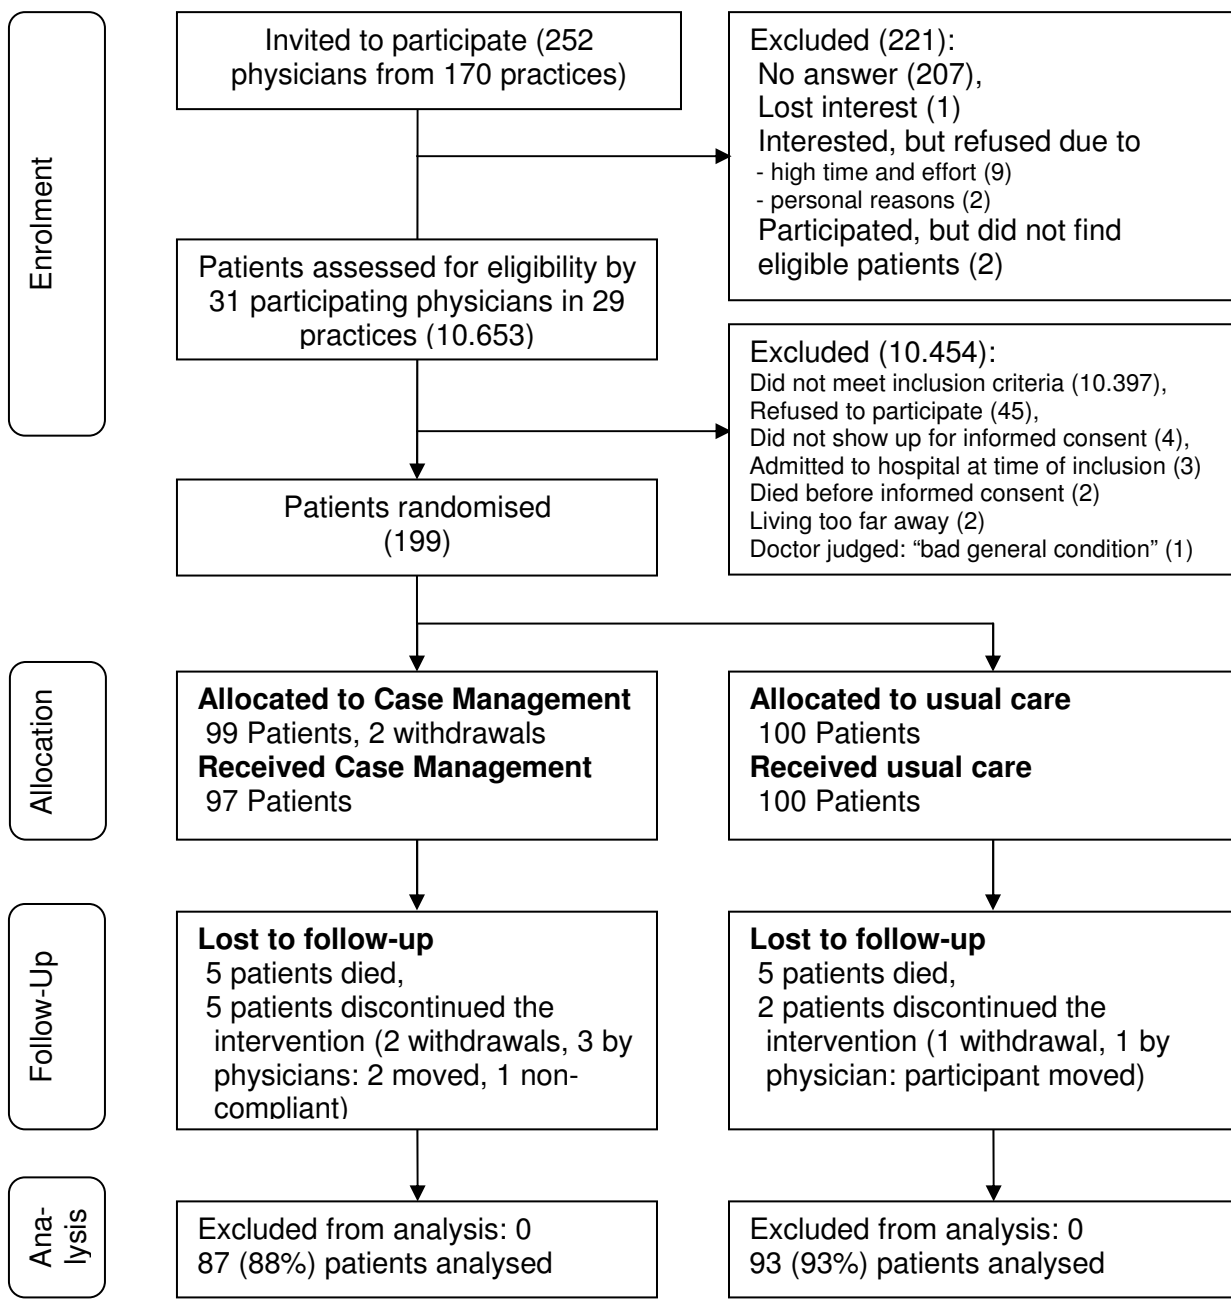

Enrollment

Invited to participate (252 physicians from 170 practices)

Patients assessed for eligibility by 31 participating physicians in 29 practices (10.653)

Excluded (221):  
 No answer (207),  
 Lost interest (1)  
 Interested, but refused due to  
 - high time and effort (9)  
 - personal reasons (2)  
 Participated, but did not find eligible patients (2)

Patients randomised (199)

Excluded (10.454):  
 Did not meet inclusion criteria (10.397),  
 Refused to participate (45),  
 Did not show up for informed consent (4),  
 Admitted to hospital at time of inclusion (3)  
 Died before informed consent (2)  
 Living too far away (2)  
 Doctor judged: "bad general condition" (1)

Allocation

**Allocated to Case Management**  
 99 Patients, 2 withdrawals  
**Received Case Management**  
 97 Patients

**Allocated to usual care**  
 100 Patients  
**Received usual care**  
 100 Patients

Follow-Up

**Lost to follow-up**  
 5 patients died,  
 5 patients discontinued the intervention (2 withdrawals, 3 by physicians: 2 moved, 1 non-compliant)

**Lost to follow-up**  
 5 patients died,  
 2 patients discontinued the intervention (1 withdrawal, 1 by physician: participant moved)

Analysis

Excluded from analysis: 0  
 87 (88%) patients analysed

Excluded from analysis: 0  
 93 (93%) patients analysed
